# Supplementary material for: Near-infrared heavy-metal-free SnSe/ZnSe quantum dots for efficient photoelectrochemical hydrogen generation
Source: Royal Society of Chemistry journal article supplement (doi:10.1039/d0nr09154e), 2021-01-01
Supplement: d0nr09154e1.pdf [file d0nr09154e1.pdf]

## Supporting Information

### **Near Infrared heavy-metal-free SnSe/ZnSe Quantum Dots for Efficient Photoelectrochemical Hydrogen Generation**

Shihuan Ren, Maorong Wang, Xiaohan Wang, Guangting Han, Yuanming Zhang\*, Haiguang Zhao\*, Alberto Vomiero\*

S. H. Ren, X.H. Wang

College of Textiles & Clothing, Qingdao University, No. 308 Ningxia Road, Qingdao 266071,  
P. R. China

Dr. M. R. Wang, Dr. G. T. Han, Dr. Y. M. Zhang, Dr. H. G. Zhao

State Key Laboratory of Bio-Fibers and Eco-Textiles & College of Physics, Qingdao  
University, No. 308 Ningxia Road, Qingdao 266071, P. R. China

Dr. A. Vomiero

Division of Materials Science, Department of Engineering Sciences and Mathematics, Luleå  
University of Technology, SE-971 87 Luleå, Sweden and Department of Molecular Sciences  
and Nano Systems, Ca' Foscari University of Venice Via Torino 155, 30172 Venezia Mestre  
E-mail: (Zhangyuanming001@163.com; [hgzhao@qdu.edu.cn](mailto:hgzhao@qdu.edu.cn); [alberto.vomiero@ltu.se](mailto:alberto.vomiero@ltu.se))

### **Experimental section**

**1.1 Materials:**  $\text{SnCl}_2$  (98%), Selenourea (99.9%), oleylamine (OLA) (technical grade 70%), oleic acid (OA) (technical grade 90%), octadecene (ODE), Ti-Nanoxide BL/SC were bought from Sigma-Aldrich Inc. and Zinc acetate dihydrate (98%) were purchased from Sigma-Aldrich. Sodium sulfide ( $\text{Na}_2\text{S}$ ), sodium sulfite ( $\text{Na}_2\text{SO}_3$ ), toluene, methanol, and ethanol were obtained from Sinopharm Chemical Reagent Co., Ltd. Titania paste (code18NR-AO) was supplied by Dyesol. FTO coated glass substrates with sheet resistance of  $10\ \Omega\ \text{square}^{-1}$  were purchased from Pilkington glasses. All chemicals were used as-received.

**1.2  $\text{TiO}_2$  film preparation:** Briefly a thin blocking layer was first spin-coated on the FTO glass.  $\text{TiO}_x$  solution (50  $\mu\text{l}$ ) was dropped on the UV-cleaned FTO glass at spinning rate of 6000 r.p.m. for 30 s. Then, the film was annealed at  $500\ ^\circ\text{C}$  for 30 min under ambient atmosphere with a ramp rate of  $2\ ^\circ\text{C}/\text{min}$ . Then the commercial  $\text{TiO}_2$  paste (18NRAO) composed of 20 and 450 nm anatase particles were deposited on top of the blocking layer by tape casting. The as-prepared thin film was first dried at  $25\ ^\circ\text{C}$  for 15 min at ambient conditions and then placed on a hot plate for 6 min at  $110\ ^\circ\text{C}$ . Subsequently, the thin films were sintered according to the following temperature profile:  $325\ ^\circ\text{C}/5\ \text{min}$ ,  $375\ ^\circ\text{C}/5\ \text{min}$ ,  $450\ ^\circ\text{C}/15\ \text{min}$  and  $500\ ^\circ\text{C}/30\ \text{min}$  with a ramp rate of  $2\ ^\circ\text{C}/\text{minute}$ . After cooling to room temperature, a  $\text{TiO}_2$  mesoporous film was achieved.

## Supporting figures and tables

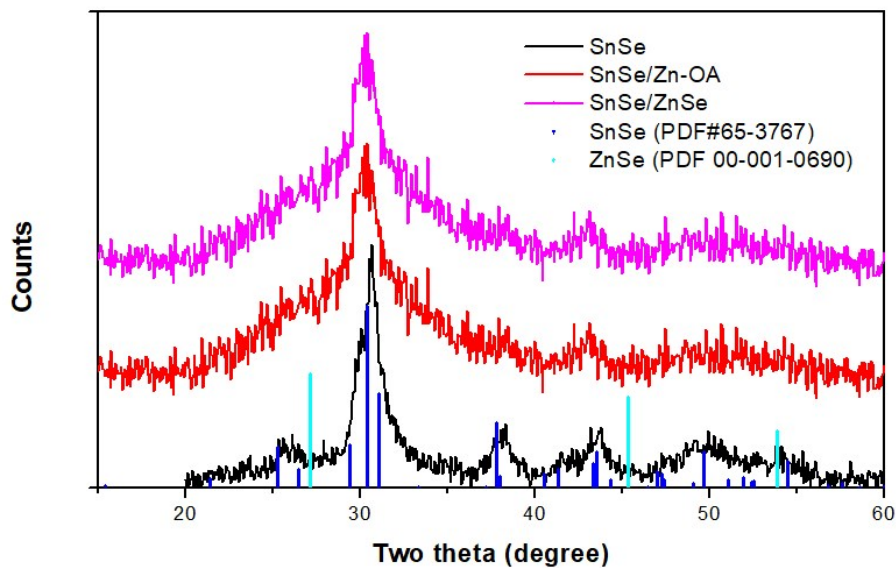

**Fig. S1** XRD patterns of SnSe QDs, SnSe-ZnOA QDs and SnSe/ZnSe QDs. The QDs were synthesized at 100 °C with Sn/Se ratio of 4:1. The XRD peaks locate between the peak of orthorhombic crystal structured SnSe (blue) and zinc blend ZnSe (light green).

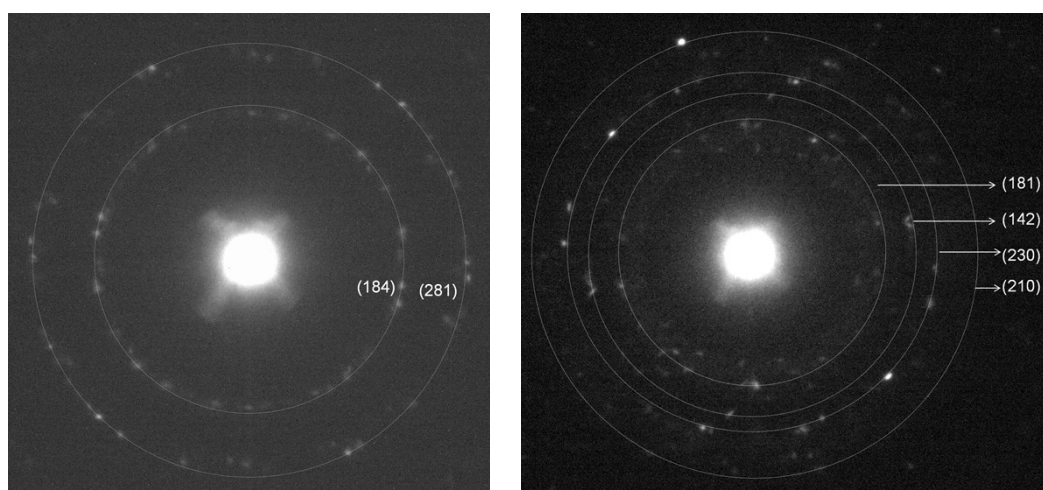

**Fig. S2** (Left) SAED patterns of SnSe/ZnSe QDs. The SnSe QDs before cation exchange were synthesized at 90 °C with Sn/Se ratio of 2 and  $\text{SnCl}_2$  contrition of 0.2 M. (Right) SAED patterns of SnSe/ZnSe QDs. The SnSe QDs before cation exchange were synthesized at 125 °C with Sn/Se ratio of 2 and  $\text{SnCl}_2$  contrition of 0.1 M.

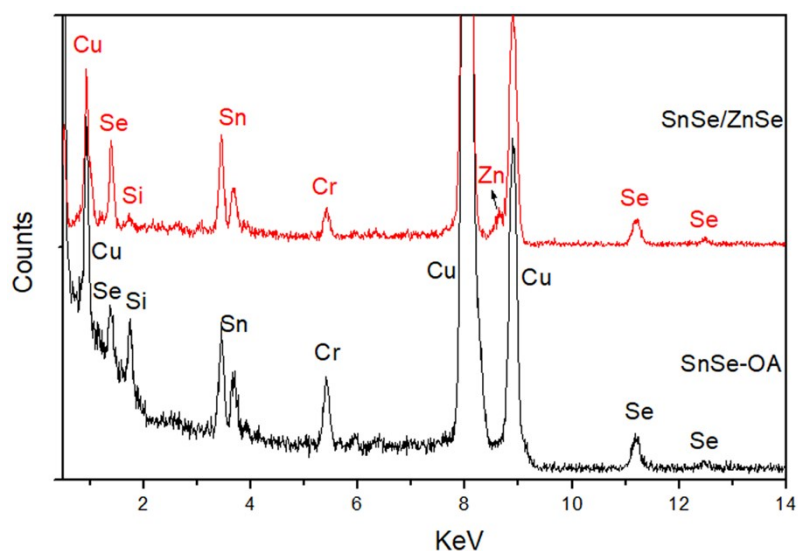

**Fig. S3** EDS spectra of as-obtained SnSe QDs and SnSe/ZnSe QDs. The SnSe QDs were synthesized at 100 °C with Sn/Se ratio of 4 and SnCl<sub>2</sub> contrition of 0.4 M.

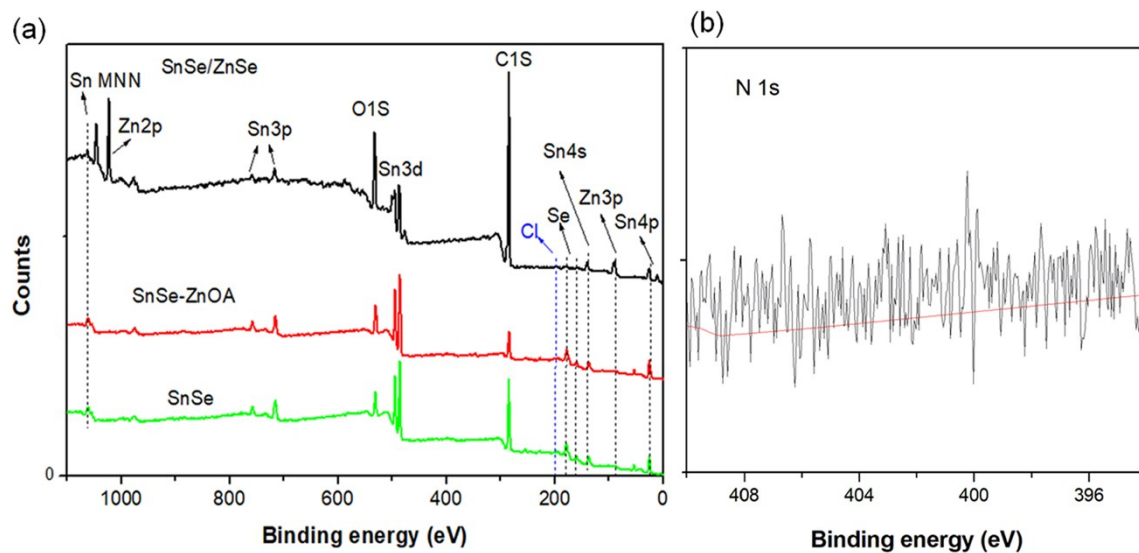

**Fig. S4** (a) XPS spectra of SnSe QDs, SnSe-ZnOA, and SnSe/ZnSe QDs. (b) High resolution XPS N1s spectrum of SnSe/ZnSe QDs. The SnSe QDs seed were synthesize with Sn/Se ratio of 4 and concentration of SnCl<sub>2</sub> of 0.4 M at 100 °C.

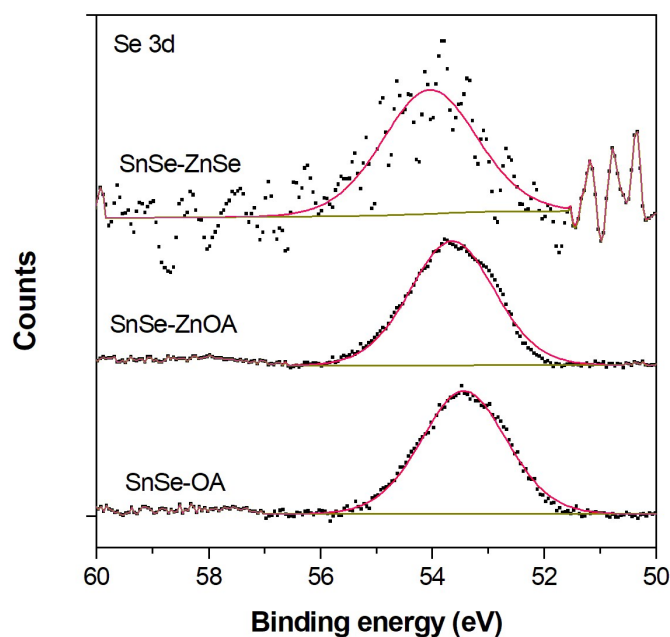

**Fig. S5** High resolution XPS Se 3d spectra of SnSe QDs, SnSe-ZnOA, and SnSe/ZnSe QDs. The SnSe QDs seed were synthesized with Sn/Se ratio of 4 and concentration of  $\text{SnCl}_2$  of 0.4 M at 100 °C.

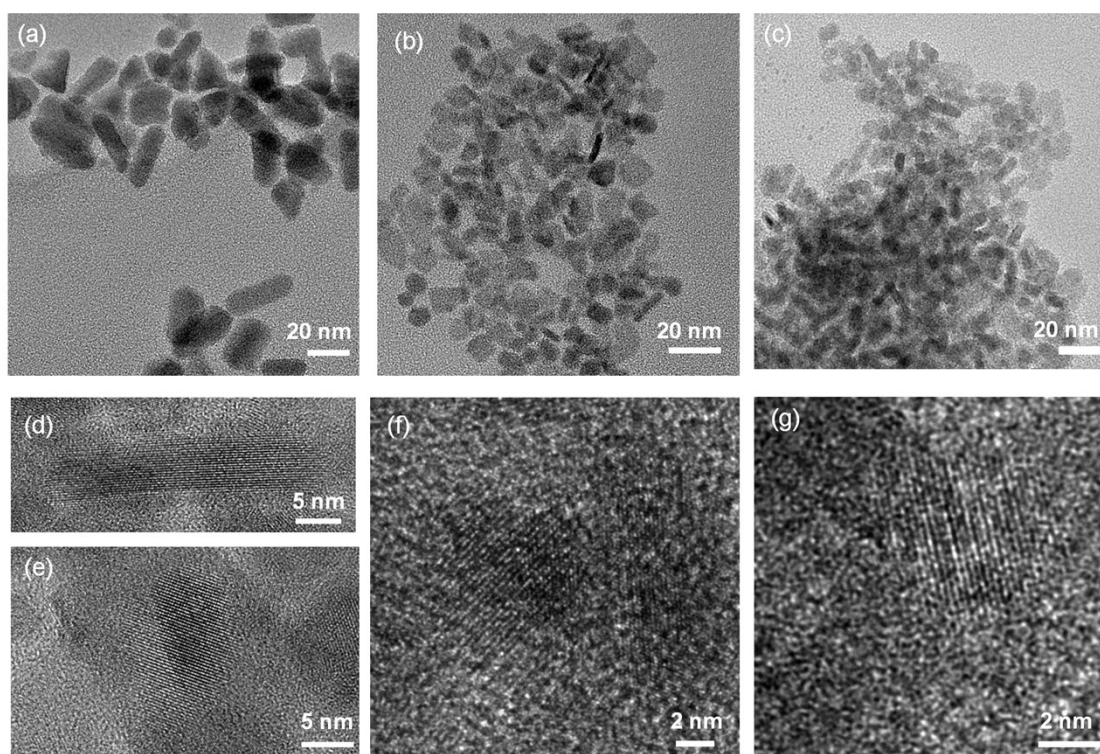

**Fig. S6** TEM and HR-TEM of as-synthesized SnSe-ZnOA nanocrystals using the concentration of  $\text{SnCl}_2$  of 0.05 M at different temperatures: (a, d, e) 125 °C; (b, f) 100 °C and (c, g) 80 °C.



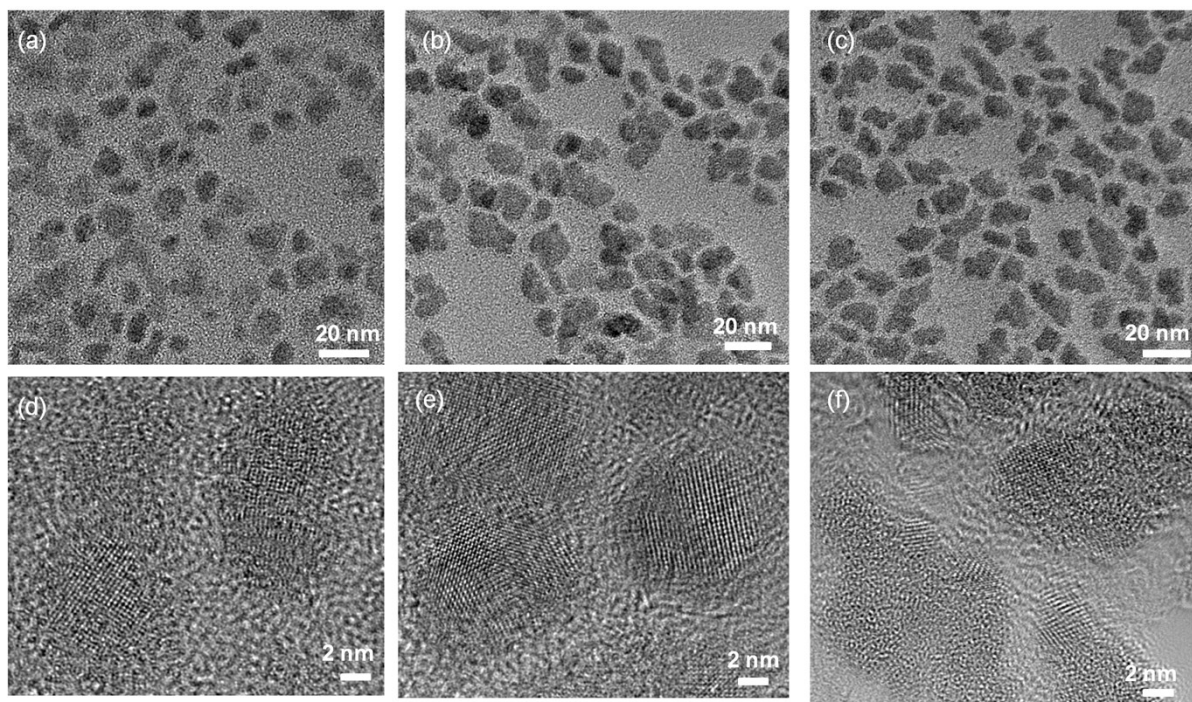

**Fig. S7** TEM and HR-TEM of as-synthesized SnSe nanocrystals using the concentration of  $\text{SnCl}_2$  of 0.2 M at different temperatures: (a, d) 100 °C; (b, e) 90 °C and (c, f) 80 °C.

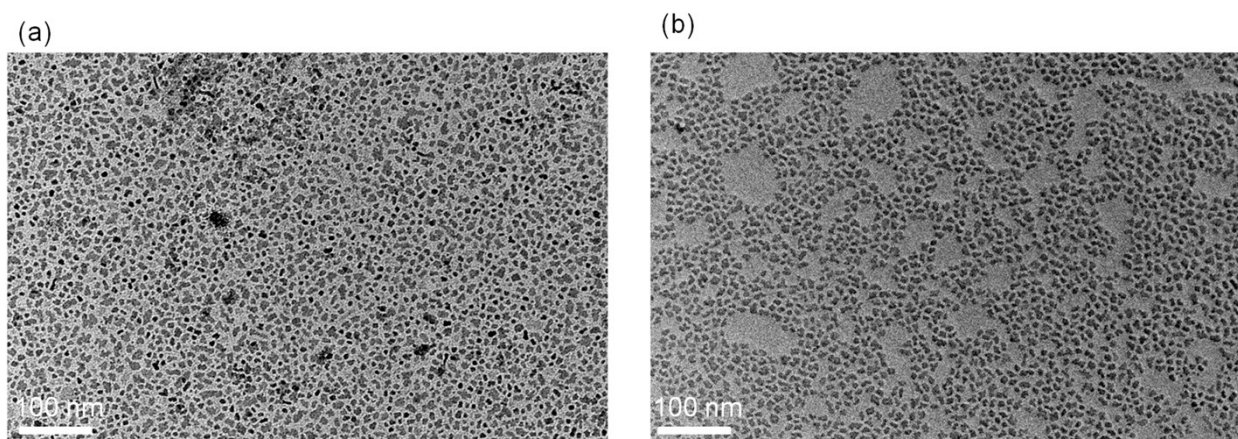

**Fig. S8** TEM images of (a) SnSe-ZnOA, and (b) SnSe/ZnSe QDs. The SnSe QDs seed were synthesized with Sn/Se ratio of 4 and concentration of  $\text{SnCl}_2$  of 0.4 M at 100 °C.

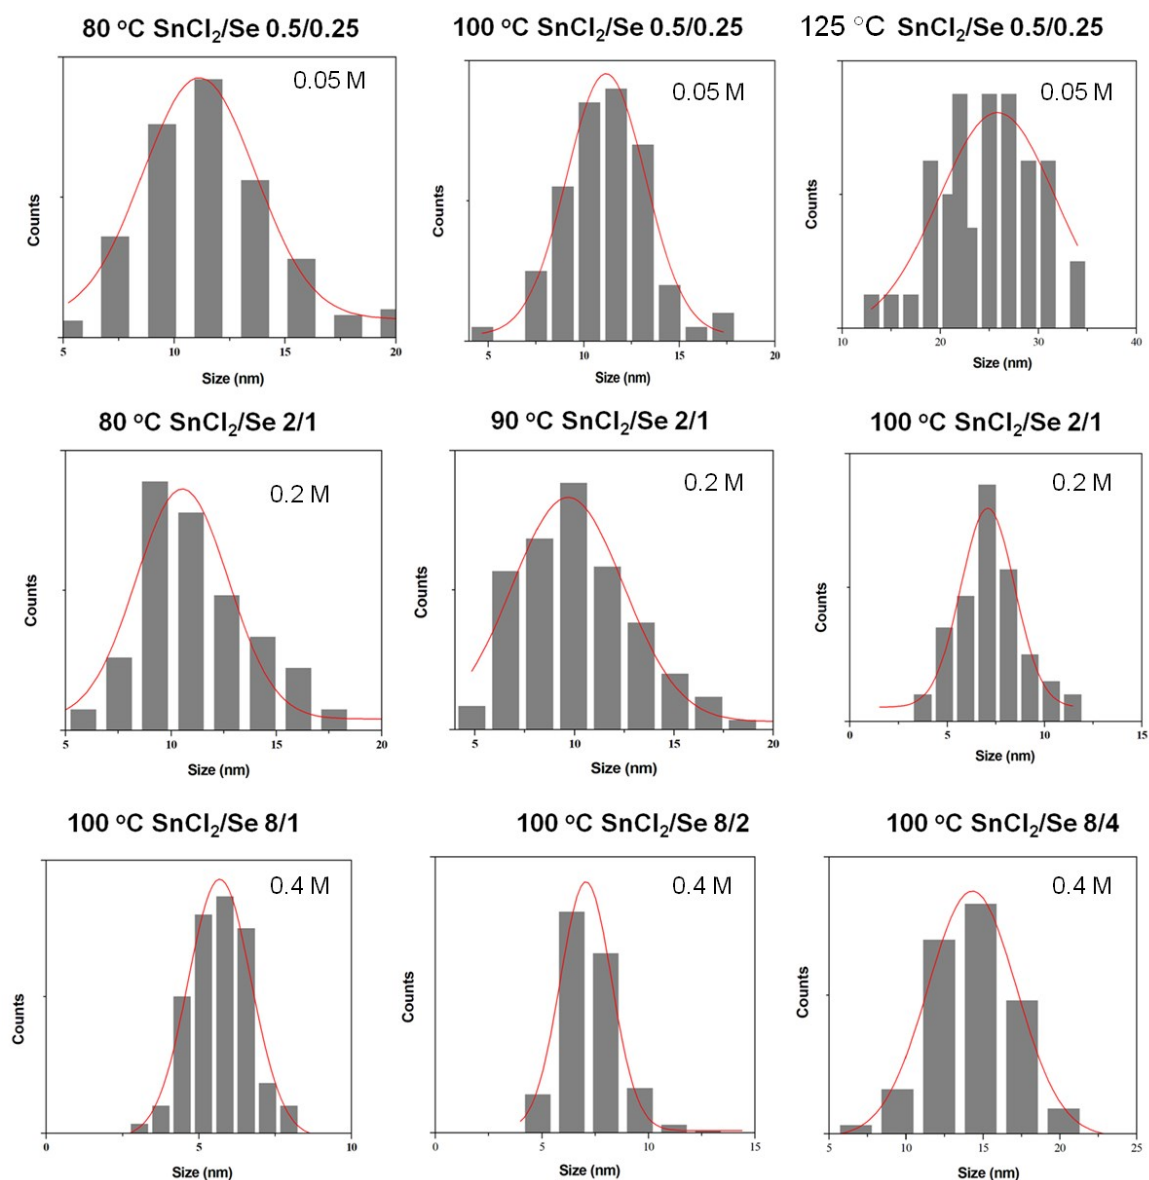

**Fig. S9** Size distribution of SnSe-ZnOA QDs synthesized under different reaction conditions. The concentrations of the SnCl<sub>2</sub> were included in the figures.

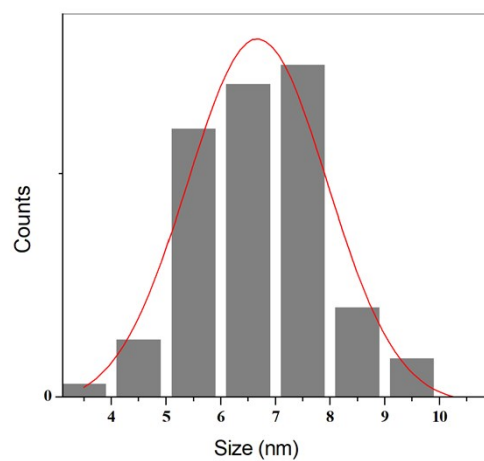

**Fig. S10** Size distribution of SnSe/ZnSe QDs. The SnSe QDs seed were synthesized with Sn/Se ratio of 4 and concentration of  $\text{SnCl}_2$  of 0.4 M at 100 °C.

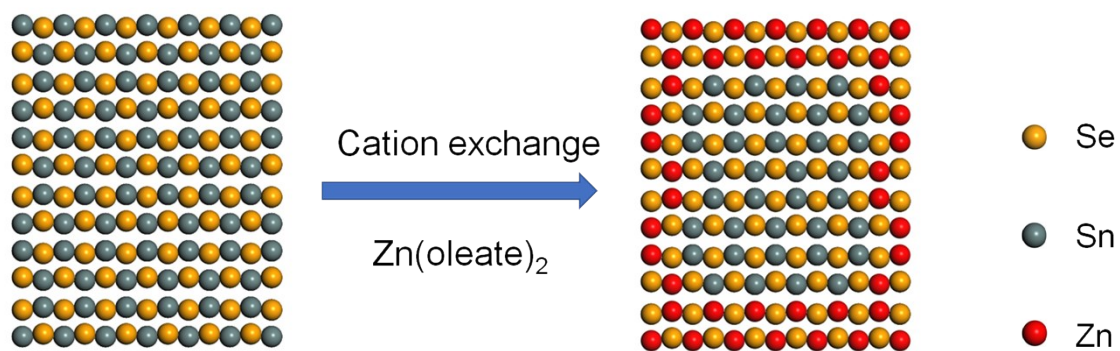

**Fig. S11** Scheme for the preparation of Zn stabilized SnSe QDs.



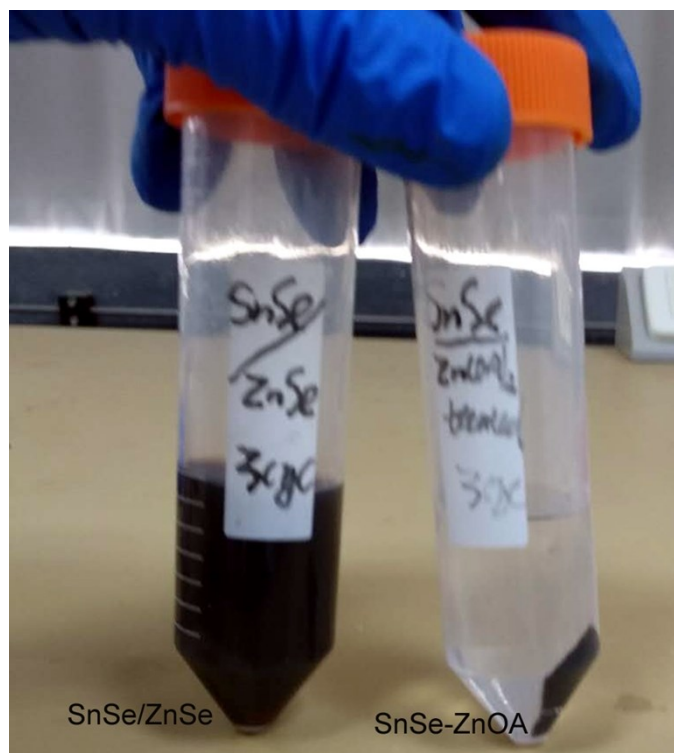

**Fig. S12** Photographs of the SnSe/ZnSe (left) and SnSe-ZnOA (right) QDs synthesized at 100 °C with Sn/Se ratio of 4:1. The as-prepared QDs were purified three cycles, then the mixture was centrifuged at 6000 g for 10 min. The precipitation of QDs in the bottom of the tube indicates that the colloidal stability of the SnSe-ZnOA is not good. To fairly compare the colloidal stability of the samples, all the parameters (amount of QDs, volume of ethanol and toluene, centrifugation rate and time) are identical during the purification process.

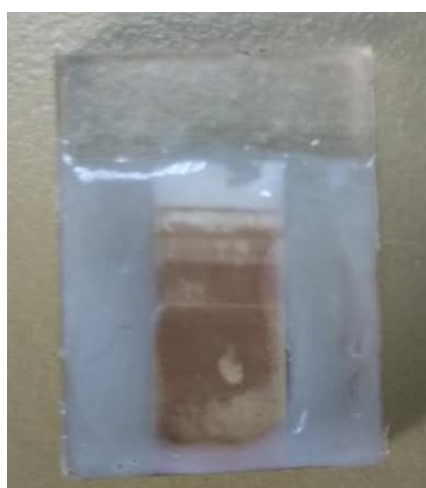

**Fig. S13** The photograph of the photoanode after SnSe/ZnSe QDs deposition. A brown color indicates the successful deposition of SnSe/ZnSe QDs into the  $\text{TiO}_2$  film. The anode was further sealed by the epoxy glue.

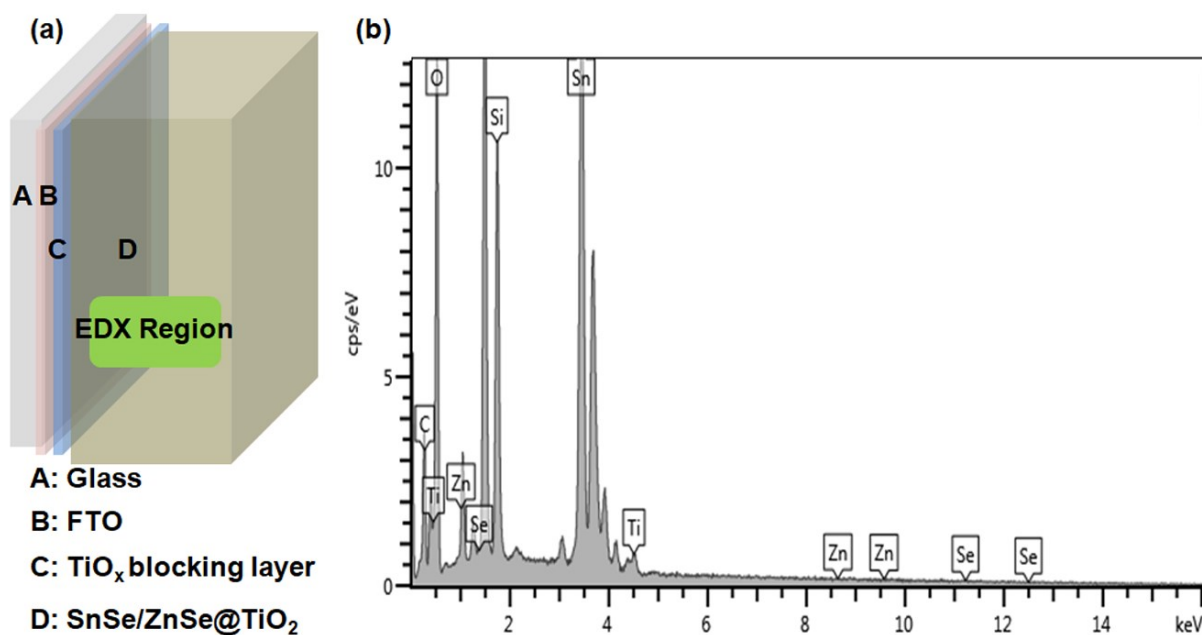

**Fig. S14** (a) Scheme of the configuration of the photoanode after SnSe/ZnSe QDs deposition. (b) EDS of the anode with the fixed region (green). Due to the cross-section of the film is not flat, we cannot precisely do the EDS mapping for the cross-section.

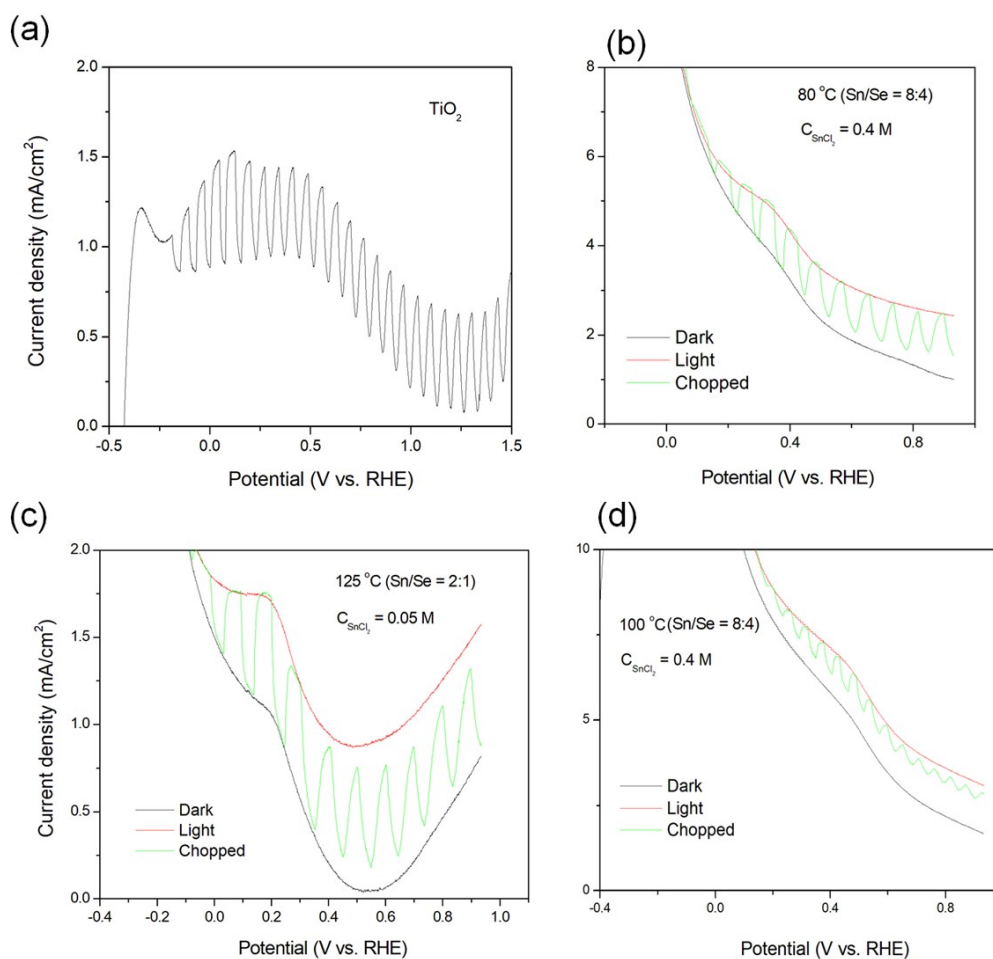

**Fig. S15**  $J$ - $V$  (versus RHE) of photoelectrodes in the dark (black curve), under continuous (red curve) and chopped (green curve) illumination (AM 1.5G, 100 mW/cm<sup>2</sup>): (a) TiO<sub>2</sub>; (b) SnSe QDs synthesized at 80 °C; (c) SnSe/ZnSe QDs using SnSe seed synthesized at 125 °C; (d) SnSe QDs synthesized at 100 °C

**Table S1** Cost of chemicals for SnSe/ZnSe quantum dots in an industrial scale production.

| Chemical          | Batch size<br>Kg | Price per batch<br>(\$) | Price per<br>\$/g | Source link                                                                                                                                                                                                                                                                                   |
|-------------------|------------------|-------------------------|-------------------|-----------------------------------------------------------------------------------------------------------------------------------------------------------------------------------------------------------------------------------------------------------------------------------------------|
| SnCl <sub>2</sub> | 1000             | 2000                    | 2                 | <a href="https://www.alibaba.com/product-detail/high-purity-tin-chloride-SnCl2-for_60685592707.html?spm=a2700.galleryoffelist.0.0.1b9462728nn9Ps">https://www.alibaba.com/product-detail/high-purity-tin-chloride-SnCl2-for_60685592707.html?spm=a2700.galleryoffelist.0.0.1b9462728nn9Ps</a> |

|                               |      |      |       |                                                                                                                                                                                                                                                                                                                                 |
|-------------------------------|------|------|-------|---------------------------------------------------------------------------------------------------------------------------------------------------------------------------------------------------------------------------------------------------------------------------------------------------------------------------------|
| <b>Selenourea</b>             | 1000 | 1000 | 1     | <a href="https://www.alibaba.com/product-detail/SELENOUREA-CAS-630-10-4-_741095164.html?spm=a2700.galleryofferlist.0.0.4b1c5178JuzKPK">https://www.alibaba.com/product-detail/SELENOUREA-CAS-630-10-4-_741095164.html?spm=a2700.galleryofferlist.0.0.4b1c5178JuzKPK</a>                                                         |
| <b>Oleylamine</b>             | 1000 | 4500 | 4.4   | <a href="https://www.alibaba.com/product-detail/Oleylamine-CAS-112-90-3_1600084783607.html?spm=a2700.galleryofferlist.0.0.2bdc3356eUnpcE&amp;s=p">https://www.alibaba.com/product-detail/Oleylamine-CAS-112-90-3_1600084783607.html?spm=a2700.galleryofferlist.0.0.2bdc3356eUnpcE&amp;s=p</a>                                   |
| <b>Oleic acid</b>             | 1000 | 1300 | 1.3   | <a href="https://www.alibaba.com/product-detail/zhonglan-Oleic-acid-CAS-112-80_62505264286.html?spm=a2700.galleryofferlist.0.0.4fb31517U7XJtW&amp;s=p">https://www.alibaba.com/product-detail/zhonglan-Oleic-acid-CAS-112-80_62505264286.html?spm=a2700.galleryofferlist.0.0.4fb31517U7XJtW&amp;s=p</a>                         |
| <b>Zinc acetate dihydrate</b> | 1000 | 2180 | 2.18  | <a href="https://www.alibaba.com/product-detail/zinc-acetate-dihydrate-manufacturer_60618403238.html?spm=a2700.galleryofferlist.0.0.6e5f38b049LQ99&amp;s=p">https://www.alibaba.com/product-detail/zinc-acetate-dihydrate-manufacturer_60618403238.html?spm=a2700.galleryofferlist.0.0.6e5f38b049LQ99&amp;s=p</a>               |
| <b>Octadecene</b>             | 1000 | 3    | 0.003 | <a href="https://www.alibaba.com/product-detail/Chinese-professional-manufactuer-of-Octadecene-CAS_62514487508.html?spm=a2700.galleryofferlist.0.0.6a4272d4hJtX7J">https://www.alibaba.com/product-detail/Chinese-professional-manufactuer-of-Octadecene-CAS_62514487508.html?spm=a2700.galleryofferlist.0.0.6a4272d4hJtX7J</a> |
| <b>Ethanol</b>                | 1000 | 1000 | 1     | <a href="https://www.alibaba.com/product-detail/99-9-absolute-ethanol-Colorless-clear_1600085414077.html?spm=a2700.galleryofferlist.0.0.6b3923862fIMDK&amp;s=p">https://www.alibaba.com/product-detail/99-9-absolute-ethanol-Colorless-clear_1600085414077.html?spm=a2700.galleryofferlist.0.0.6b3923862fIMDK&amp;s=p</a>       |
| <b>Toluene</b>                | 4    | 20   | 5     | <a href="https://www.reagent.com.cn/goodsDetail/69e5ab91b6534aa3bae60b8e860ac32f">https://www.reagent.com.cn/goodsDetail/69e5ab91b6534aa3bae60b8e860ac32f</a>                                                                                                                                                                   |

**Table S2.** Estimated prices for SnSe/ZnSe quantum dots in the lab scale. The calculation considers the cost of chemicals used for one batch reaction (0.76 g SnCl<sub>2</sub>, 0.125 g Selenourea, 9 mL oleylamine, 3 mL oleic acid, 0.5 g Zinc acetate dihydrate, 10 mL Octadecene, 50 mL ethanol and 30 mL toluene with the production of 0.1 g SnSe/ZnSe for one batch).

Based on ref. 1, we also estimate non-material-related cost as 0.016 \$/g for quantum dots in our price estimations as an additional expense in the QD production.

| <b>Product</b>                                | <b>Cost per Gram (\$/g)</b> |
|-----------------------------------------------|-----------------------------|
| <b>SnSe/ZnSe QDs</b>                          | 0.27                        |
| <b>CuInSe<sub>2</sub>/ZnS QDs<sup>1</sup></b> | 0.59                        |

1. Wu, K.F., Li H.B., and Klimov, V.I. Tandem luminescent solar concentrators based on engineered quantum dots, *Nature Photonics*, 2018, 12, 105-110.

**Table S3** Atomic ratio of the metallic Sn/Sn-Se based on the high resolution XPS data as shown in Figure 3a.

| <b>QDs</b>       | <b>Peak position<br/>(metallic Sn) (eV)</b> |        | <b>Peak position<br/>(Sn-Se) (eV)</b> |        | <b>Atomic ratio of<br/>metallic Sn/Sn-Se</b> |
|------------------|---------------------------------------------|--------|---------------------------------------|--------|----------------------------------------------|
| <b>SnSe</b>      | 493.71                                      | 485.35 | 494.75                                | 486.35 | 42:100                                       |
| <b>SnSe-ZnOA</b> | 493.77                                      | 485.19 | 495.01                                | 486.56 | 28: 100                                      |
| <b>SnSe/ZnSe</b> |                                             |        | 495.35                                | 486.69 | 0                                            |

**Table S4** Molar ratio of the Sn/Se/Zn based on the high resolution XPS data. SnSe QDs were synthesized at 100 °C with Sn/Se ratio of 4:1 and concentration of SnCl<sub>2</sub> of 0.4 M. The calculated ZnSe thickness in SnSe-ZnOA is 0.05 nm and the thickness of the SnSe/ZnSe is 0.3 nm based on EDS data.

| <b>QDs</b>       | <b>Molar ratio of<br/>Sn/Se/Zn (XPS)</b> | <b>Molar ratio of<br/>Sn/Se/Zn (EDS)</b> | <b>Thickness<br/>(nm)</b> |
|------------------|------------------------------------------|------------------------------------------|---------------------------|
| <b>SnSe</b>      | 10: 7                                    | 10:7.5                                   | ----                      |
| <b>SnSe-ZnOA</b> | 10: 6:0.6                                | 10: 7:0.5                                | 0.05                      |
| <b>SnSe/ZnSe</b> | 10: 4:20                                 | 10:5:3.8                                 | 0.3                       |



## Hydrogen generation calculation

Based on the methodology described in Ref. 1, we can calculate the hydrogen generation rate.

The theoretical number of moles of hydrogen was obtained according to Faraday's law:

$$q = nF$$

With the definitions of electrolysis based on the following equations:

$$n = \frac{m}{m_e} \quad \text{and} \quad q = \int_{t_1}^{t_2} I dt$$

Where  $n$  is the number of equivalents,  $m$  is the mass of the substance liberated at an electrode in grams (g),  $m_e$  is the molar mass of the substance in grams per mol (g/mol), i.e.  $n$  equals to the number of moles. A common assumption on the current being constant over time, allow us to us the mathematical equivalent that can be simplified as [2]:

$$n = \frac{1q}{zF} = \frac{1I \times t}{z F}$$

Where  $z$  is the number of transferred electrons per mole of water (i.e.  $z=2$ ),  $q$  is the electric charge in coulombs (C),  $F$  is the Faraday constant (i.e. 96484.34 C/mole),  $I$  is the photocurrent in amperes (A) and  $t$  is time in seconds (s).

We used the CdSe/CdS QDs sensitized anode and Pt counter electrode as a reference to monitor the H<sub>2</sub> evolution as a function of time as this type QD is more stable compared to SnSe/ZnSe QDs and present very accurate trend between the current density and time (Ref. 3). Based on the calibration curve in Ref. 3, we calculated the hydrogen generation rate in the similar PEC by using the above-mentioned equation.

### References:

- [1] F.C.J. Strong, Faraday's laws in one equation, J. Chem. Educ. 38 (1961) 98.
- [2] W.B. Jensen, Faraday's Laws or Faraday's Law?, J. Chem. Educ. 89 (2012) 1208-1209.
- [3] R. Adhikari, L. Jin, F. Navarro-Pardo, D. Benetti, B. AlOtaibi, S. Vanka, H. G. Zhao, Z. T. Mi, A. Vomiero, F. Rosei, High efficiency, Pt-free photoelectrochemical cells for solar hydrogen generation based on “giant” quantum dots, Nano Energy 27 (2016) 265–274.
